# Supplementary material for: Do pupils at research-informed schools actually perform better? Findings from a study at English schools
Source: Frontiers journal article supplement (doi:10.3389/feduc.2022.1011241), 2023-01-04
Supplement: Data_Sheet_1.pdf [file Data_Sheet_1.pdf]

# Do pupils at research-informed schools actually perform better?

## Findings from a study at English schools

**Jana Groß Ophoff, Chris Brown, Christoph Helm**

### Appendix: Technical details

To begin with, the evaluation of the measurement models for each scale is reported for level 1 (individual teachers) and level 2 (school). This is followed by the results for the structural model, which was derived from the theoretically grounded assumptions in previous chapters (see Figure 1). In conclusion, the average self-reported research use etc. is compared between teachers and schools with different Ofsted-judgements.

### A1: Evaluation of measurement models

Single-level and multilevel confirmatory factor analyses demonstrate acceptable to good fit for all models (Table 2), which indicates that the proposed measurement models reasonably account for the observed data. The only exception is the level 2-SRMR for OL, which is too high.

Table A1: Confirmatory factor analyses of the study variables

| Model                                   | # items | # par | Chi2   | df | Chi2/df | CFI   | TLI   | RMSEA | SRMR      |
|-----------------------------------------|---------|-------|--------|----|---------|-------|-------|-------|-----------|
| Single-level analysis                   |         |       |        |    |         |       |       |       |           |
| Trust                                   | 6       |       | 28.948 | 8  | 3.6     | .959  | .924  | .057  | .033      |
| Organizational learning                 | 6       | 18    | 34.890 | 9  | 3.9     | .978  | .964  | .060  | .025      |
| Research use                            | 7       | 22    | 73.783 | 13 | 5.7     | .929  | .885  | .073  | .045      |
| Multilevel analysis (shared constructs) |         |       |        |    |         |       |       |       |           |
| Trust                                   | 6       | 38    | 20.096 | 10 | 2.1     | .988  | .963  | .036  | .005/.096 |
| Organizational learning                 | 6       | 38    | 6.268  | 10 | 0.6     | 1.000 | 1.006 | .000  | .002/.215 |
| Research use                            | 7       | 49    | 14.938 | 14 | 1.1     | .999  | .997  | .009  | .002/.061 |

Note. Abbreviations: # items = number of included items; # par = number of model parameters; df = degrees of freedom.

### A2: Comparison of the factor structure for the Research Use scale and the Organizational Learning scale

The high level 2 correlations between the Research Use (RU) scale and the Organizational Learning (OL) scale raise the question whether it is warranted at all to empirically distinguish between the two constructs on school level. Table 4 sheds light on the question, whether RU and OL should be modeled as separate constructs or not. The comparison of the factor structure at school level shows that model fit significantly increases when RU and OL are modelled as joint single factor (i.e., the correlation between the two factors is constrained to 1) instead of two separate factors. However, the same does not apply on single-level, where the model with two separate factors proves to be better fitting to the data.

Table A2: Comparison of the factor structure for the Research Use scale and the Organizational Learning scale on single-level and multilevel analysis

| Levels of Analysis    | # factors  | # par | Chi2     | df | Chi2/df | CFI  | TLI  | RMSEA | SRMR      | correlation | p    | Δ Chi2   | p    |
|-----------------------|------------|-------|----------|----|---------|------|------|-------|-----------|-------------|------|----------|------|
| Single-level analysis | 2: RU + OL | 40    | 290.939  | 64 | 4.5     | .912 | .893 | .063  | .049      | .169        | .001 |          |      |
|                       | 1: RUOL    | 39    | 1054.213 | 65 | 16.2    | .617 | .540 | .131  | .136      |             |      | -763.274 | .001 |
| Multilevel analysis   | 2: RU + OL | 131   | 92.731   | 64 | 1.4     | .992 | .981 | .022  | .003/.290 | .953        | .001 |          |      |
|                       | 1: RUOL    | 130   | 88.593   | 65 | 1.4     | .994 | .984 | .020  | .003/.289 |             |      | 4.148    | .042 |

Note. Abbreviations: # factors = number of factors; # par = number of model parameters; df = degrees of freedom.

### A3: Measurement invariance testing

As the effect of different school inspection ratings is of interest, too, the measurement invariance was analyzed for each of the three self-assessment scales. Due to the small number of "requires improvement" schools (N = 3), only the comparability of "good" vs. "outstanding" schools was examined, for which the results are reported in Table 5. However, only partial invariance could be established, which means that some coefficients had to be estimated freely across groups in order to obtain a non-significant drop in model fit. For some items of the TR scale (items 2, 3, 4, see Table 1) and the RU scale (items 2, 4, 5), only configural invariance is to be assumed, as the factor loadings had to be estimated freely across groups in order to obtain a non-significant drop in model fit. Furthermore, for the OL scale the intercepts differ between groups for the items 2, 3, and 4 (see Table 1).

# Groß Ophoff, Brown, & Helm: Pupil Performance & Schools' Evidence Use

Table A3: Measurement invariance testing (good vs. outstanding schools on level-1)

| Model | Measurement invariance | df | AIC       | BIC       | Chi2    | Δ Chi2 | Δ df | p    |
|-------|------------------------|----|-----------|-----------|---------|--------|------|------|
| TR    | configural             | 18 | 7634.726  | 7798.513  | 185.246 |        |      |      |
| TR    | weak (metric)          | 20 | 7633.849  | 7788.537  | 188.369 | 3.123  | 2    | .210 |
| TR    | strong (scalar)        | 25 | 7631.589  | 7763.528  | 196.109 | 7.74   | 5    | .171 |
| OL    | configural             | 18 | 10832.258 | 10995.994 | 71.484  |        |      |      |
| OL    | weak (metric)          | 23 | 10824.976 | 10965.971 | 74.202  | 2.718  | 5    | .743 |
| OL    | strong (scalar)        | 25 | 10825.134 | 10957.032 | 78.360  | 4.158  | 2    | .125 |
| RU    | configural             | 28 | 12085.532 | 12278.726 | 223.846 |        |      |      |
| RU    | weak (metric)          | 32 | 12082.178 | 12256.973 | 228.492 | 4.646  | 4    | .326 |
| RU    | strong (scalar)        | 38 | 12079.633 | 12226.829 | 237.947 | 9.455  | 6    | .150 |

Note. Note. Abbreviations: TR = trust scale (see 4.2.1); OL = Organizational learning scale (see 4.2.3); RU = Research use climate scale (see 4.2.4). Only partial invariance could be established: Factor loadings of TR2, TR4, TR5, RU4, RU5, and intercepts of OL2, OL3, OL4 (item wording, see Table 1).
